# Supplementary material for: QTug.sau-3B Is a Major Quantitative Trait Locus for Wheat Hexaploidization
Source: PubMed Central journal article supplement (PMC4199700; doi:10.1534/g3.114.013078), 2014-08-15
Supplement: supp_g3.114.013078_013078SI.pdf [file supp_g3.114.013078_013078SI.pdf]

***QTug.sau-3B* is a major quantitative trait locus for wheat hexaploidization**

Ming Hao <sup>\*,1</sup>, Jiangtao Luo <sup>\*,1</sup>, Deying Zeng <sup>\*</sup>, Li Zhang<sup>§</sup>, Shunzong Ning <sup>\*</sup>, Zhongwei Yuan <sup>\*</sup>, Zehong Yan <sup>\*</sup>,  
Huaigang Zhang <sup>†</sup>, Youliang Zheng <sup>\*</sup>, Catherine Feuillet <sup>‡,2</sup>, Frédéric Choulet <sup>‡</sup>, Yang Yen <sup>\*\*</sup>, Lianquan Zhang <sup>\*</sup>,  
Dengcai Liu <sup>\*,†,3</sup>

<sup>\*</sup> Triticeae Research Institute, Sichuan Agricultural University at Chengdu, Wenjiang, Sichuan 611130, P.R. China

<sup>§</sup>Institute of Ecological Forestry, Sichuan Agricultural University at Chengdu, Wenjiang, Sichuan 611130, P.R. China

<sup>†</sup> Key Laboratory of Adaptation and Evolution of Plateau Biota, Northwest Institute of Plateau Biology, Chinese Academy of Sciences, Xining 810001, P.R. China

<sup>‡</sup>INRA University Blaise Pascal, Joint Research Unit 1095 Genetics Diversity and Ecophysiology of Cereals, Clermont-Ferrand 63039, France

<sup>\*\*</sup> Department of Biology and Microbiology, South Dakota State University, Brookings, SD 57007, USA

<sup>1</sup>The authors contributed equal to this study.

<sup>2</sup> Present address: Bayer, Research & Development, 3500 Paramount Parkway, Morrisville, NC 27560, USA

DOI: 10.1534/g3.114.013078

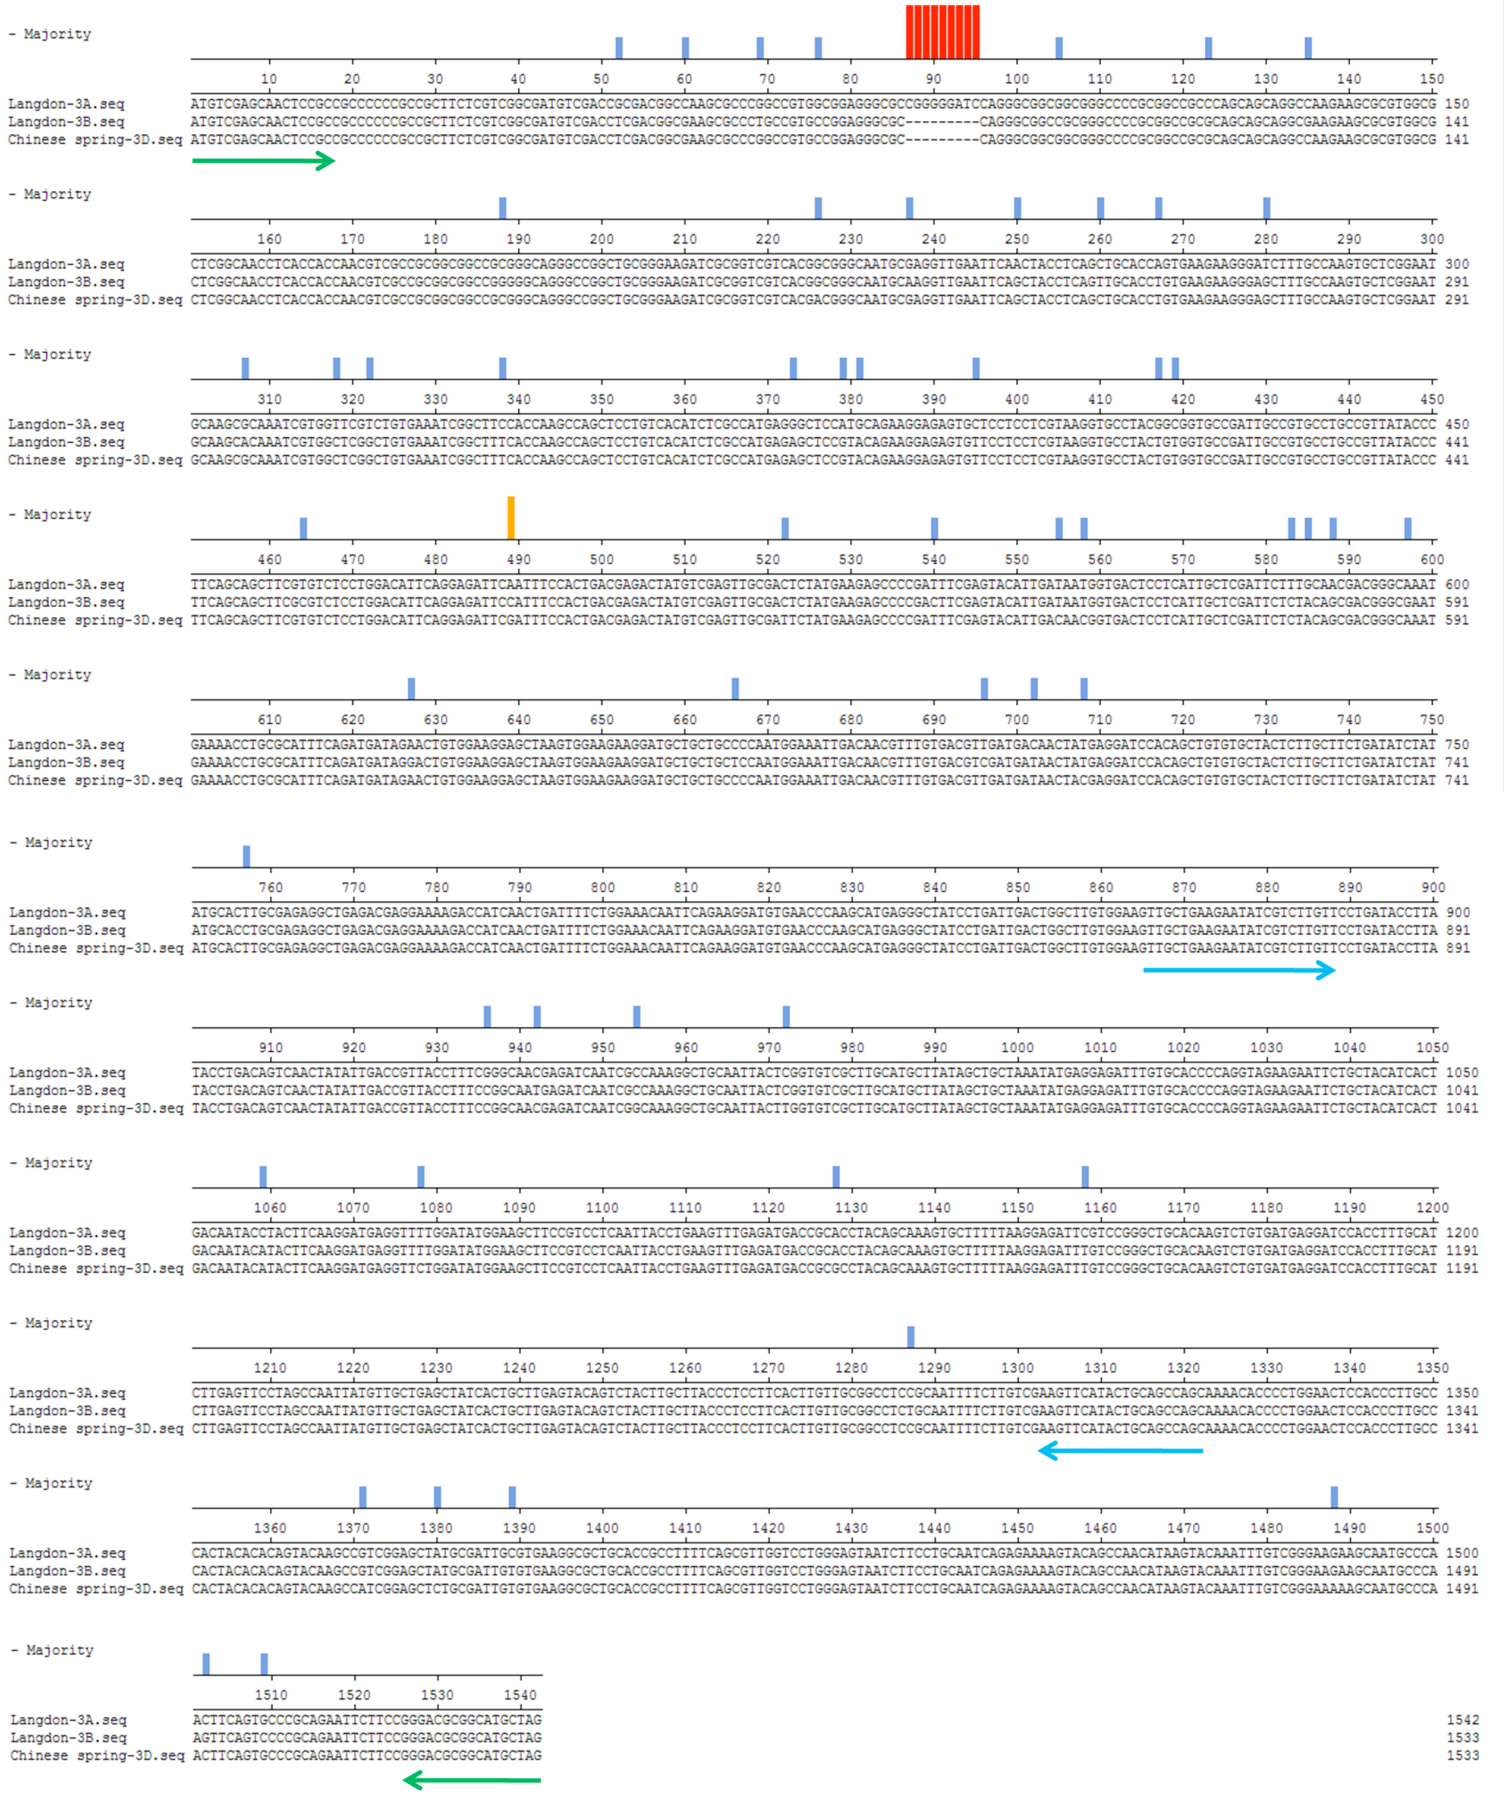

**Figure S1 Coding DNA sequence (CDS) comparisons among homologs of *tam* in wheat chromosomes 3A, 3B and 3D.** Primer sequences for the partial and full CDS are indicated by blue and green arrowheads, respectively. The bars in the major line indicate the SNPs.

**Table S1 Primers used in this study**

| Name of primer | Primer sequences (5'→3') | Annealing temperature |
|----------------|--------------------------|-----------------------|
| 6C6-3-F1       | CTACTTCCACTGCACCAGAC     | 60                    |
| 6C6-3-R1       | CGCCCTACTTTGCACACAAAA    |                       |
| F1             | GTCGCTGAAGAATATCGTCTTGTT | 58                    |
| R1             | TGTTGGCTGCAGTATGAATTT    |                       |
| F2             | ATGTCGAGCAACTCCGC        | 60                    |
| R2             | CTAGCATGCCGCGTCCC        |                       |
| F10-RT         | GCTTACCCTCCTTCACTTGT     | 60                    |
| R10-RT         | CCTTCACGCAATCGCATAG      |                       |

**Table S2 Genotypes, phenotypes and linkage map for DH1 population.**

**Table S3 Genotypes, phenotypes and linkage map for DH2 population.**

Available for download at

<http://www.g3journal.org/lookup/suppl/doi:10.1534/g3.114.013078/-/DC1>

> GenBank no. KJ863557 [organism=*Triticum turgidum*] *T. turgidum* Langdon Ttam-3A mRNA , complete cds

ATGTCGAGCAACTCCGCCGCCCCCGCCGCTTCTCGTCGGCGATGTCGACCGCGACGG  
CCAAGCGCCCGGCCGTGGCGGAGGGCGCCGGGGATCCAGGGCGGCGGGGCC  
GCGGCCGCCAGCAGCAGGCCAAGAAGCGCGTGGCGCTCGGCAACCTACCACCAAC  
GTCGCCGCGGCGGCCGCGGGCAGGGCCGGCTGCGGGAAGATCGCGGTTCGTCACGGC  
GGCAATGCGAGTTGAATCAACTACCTCAGCTGCACCAGTGAAGAAGGGATCTTT  
GCCAAGTGCTCGGAATGCAAGCGCAAATCGTGGTTCGTCTGTGAAATCGGCTTCCAC  
CAAGCCAGCTCCTGTCACATCTCGCCATGAGGGCTCCATGCAGAAGGAGAGTGCTCC  
TCCTCGTAAGGTGCCTACGGCGGTGCCGATTGCCGTGCCTGCCGTTATACCCTCAGC  
AGCTTCGTGTCTCCTGGACATTCAGGAGATTCAATTTCCACTGACGAGACTATGTCGA  
GTTGCGACTCTATGAAGAGCCCCGATTTTCGAGTACATTGATAATGGTGACTCCTCATT  
GCTCGATTCTTTGCAACGACGGGCAAATGAAAACCTGCGCATTTCAGATGATAGAAC  
TGTGGAAGGAGCTAAGTGAAGAAGGATGCTGCTGCCCAATGGAAATTGACAACGT  
TTGTGACGTTGATGACAACCTATGAGGATCCACAGCTGTGTGCTACTCTTGCTTCTGAT  
ATCTATATGCACTTGCAGAGGGCTGAGACGAGGAAAAGACCATCAACTGATTTTCTG  
GAAACAATTCAGAAGGATGTGAACCCAAGCATGAGGGCTATCCTGATTGACTGGCTT  
GTGGAAGTTGCTGAAGAATATCGTCTTGTTCCTGATACCTTATACCTGACAGTCAACT  
ATATTGACCGTTACCTTTTCGGGCAACGAGATCAATCGCCAAAGGCTGCAATTACTCGG  
TGTCGCTTGCATGCTTATAGCTGCTAAATATGAGGAGATTTGTGCACCCCAGGTAGAA  
GAATTCTGCTACATCACTGACAATACCTACTTCAAGGATGAGGTTTTGGATATGGAAG  
CTTCCGTCCTCAATTACCTGAAGTTGAGATGACCGCACCTACAGCAAAGTGCTTTTT  
AAGGAGATTCGTCCGGGCTGCACAAGTCTGTGATGAGGATCCACCTTTGCATCTTGAG  
TTCCTAGCCAATTATGTTGCTGAGCTATCACTGCTTGAGTACAGTCTACTTGCTTACCC  
TCCTTCACTTGTTGCGGCCTCCGCAATTTTCTTGTCGAAGTTCATACTGCAGCCAGCAA  
AACACCCCTGGAACCTCACCTTGCCCACTACACACAGTACAAGCCGTCGGAGCTAT  
GCGATTGCGTGAAGGCGCTGCACCGCCTTTTCAGCGTTGGTCTGGGAGTAATCTTCC  
TGCAATCAGAGAAAAGTACAGCCAACATAAGTACAAATTTGTCGGGAAGAAGCAAT  
GCCCAACTTCAGTGCCCGCAGAATTCTTCCGGGACGCGGCATGCTAG

> GenBank no. KJ863558 [organism=*Triticum turgidum*] *T. turgidum* Langdon Ttam-3B mRNA, complete cds

ATGTCGAGCAACTCCGCCGCCCCCGCCGCTTCTCGTCGGCGATGTCGACCTCGACGG  
CGAAGCGCCCTGCCGTGCCGGAGGGCGCCAGGGCGGCCGCGGGCCCCGCGGCCGCG  
CAGCAGCAGGCGAAGAAGCGCGTGGCGCTCGGCAACCTACCACCAACGTCGCCGCG  
GCGGCCGGGGCAGGGCCGGCTGCGGGAAGATCGCGGTTCGTCACGGCAGGGCAATGC  
AAGGTTGAATTCAGCTACCTCAGTTGCACCTGTGAAGAAGGGAGCTTTGCCAAGTGC  
TCGGAATGCAAGCACAAATCGTGGCTCGGCTGTGAAATCGGCTTTCACCAAGCCAGC  
TCCTGTACATCTCGCCATGAGAGCTCCGTACAGAAGGAGAGTGTTCTCCTCGTAAG  
GTGCCTACTGTGGTGCCGATTGCCGTGCCTGCCGTTATACCCTCAGCAGCTTCGCGT  
CTCCTGGACATTCAGGAGATTCCATTTCCACTGACGAGACTATGTCGAGTTGCGACTC  
TATGAAGAGCCCCGACTTCGAGTACATTGATAATGGTGACTCCTCATTGCTCGATTCT

CTACAGCGACGGGCGAATGAAAACCTGCGCATTTTCAGATGATAGGACTGTGGAAGGA  
GCTAAGTGGAAGAAGGATGCTGCTGCTCCAATGGAAATTGACAACGTTTGTGACGTC  
GATGATAACTATGAGGATCCACAGCTGTGTGCTACTCTTGCTTCTGATATCTATATGC  
ACCTGCGAGAGGCTGAGACGAGGAAAAGACCATCAACTGATTTTCTGGAACAATTC  
AGAAGGATGTGAACCCAAGCATGAGGGCTATCCTGATTGACTGGCTTGTGGAAGTTG  
CTGAAGAATATCGTCTTGTTCCTGATACCTTATACCTGACAGTCAACTATATTGACCG  
TTACCTTTCCGGCAATGAGATCAATCGCCAAAGGCTGCAATTACTCGGTGTCGCTTGC  
ATGCTTATAGCTGCTAAATATGAGGAGATTTGTGCACCCCAGGTAGAAGAATTCTGCT  
ACATCACTGACAATACATACTTCAAGGATGAGGTTTTGGATATGGAAGCTTCCGTCT  
CAATTACCTGAAGTTTGTGATGACCGCACCTACAGCAAAGTGCTTTTAAAGGAGATTT  
GTCCGGGCTGCACAAGTCTGTGATGAGGATCCACCTTGCATCTTGAGTTCCTAGCCA  
ATTATGTTGCTGAGCTATCACTGCTTGTGAGTACAGTCTACTTGCTTACCCTCCTTCACTT  
GTTGCGGCCTCTGCAATTTTCTTGTGCAAGTTCATACTGCAGCCAGCAAAAACACCCCT  
GGAATCCACCCTTGCCACTACACACAGTACAAGCCGTCGGAGCTATGCGATTGTGT  
GAAGGCGCTGCACCGCCTTTTCAGCGTTGGTCTCTGGGAGTAATCTTCTGCAATCAGA  
GAAAAGTACAGCCAACATAAGTACAAATTTGTGCGGGAAGAAGCAATGCCCAAGTTCA  
GTCCCCGAGAATTCTTCCGGGACGCGGCATGCTAG

> GenBank no. KJ863559 [organism=*Triticum aestivum*] *T. aestivum* Chinese spring Ttam-3D  
mRNA, complete cds

ATGTCGAGCAACTCCGCCGCCCCCGCCGTTCTCGTCGGCGATGTCGACCTCGACGG  
CGAAGCGCCCGGCCGTGCCGGAGGGCGCCAGGGCGGCGGGCCCCGCGGCCGCG  
CAGCAGCAGGCCAAGAAGCGCGTGGCGCTCGGCAACCTCACCACCAACGTCGCCGCG  
GCGGCCGCGGGCAGGGCCGGCTGCGGGAAGATCGCGGTCGTCACGACGGGCAATGC  
GAGGTTGAATTCAGCTACCTCAGCTGCACCTGTGAAGAAGGGAGCTTTGCCAAGTGC  
TCGGAATGCAAGCGCAAATCGTGGCTCGGCTGTGAAATCGGCTTTCACCAAGCCAGC  
TCTGTACATCTCGCCATGAGAGCTCCGTACAGAAGGAGAGTGTTCCTCCTCGTAAG  
GTGCCTACTGTGGTGCCGATTGCCGTGCCTGCCGTTATACCCTTACAGCAGCTTCGTGT  
CTCCTGGACATTCAGGAGATTCGATTTCCACTGACGAGACTATGTGCGAGTTGCGATTC  
TATGAAGAGCCCCGATTTTCGAGTACATTGACAACGGTGACTCCTCATTGCTCGATTCT  
CTACAGCGACGGGCAAATGAAAACCTGCGCATTTTCAGATGATAGAACTGTGGAAGGA  
GCTAAGTGGAAGAAGGATGCTGCTGCCCAATGGAAATTGACAACGTTTGTGACGTT  
GATGATAACTACGAGGATCCACAGCTGTGTGCTACTCTTGCTTCTGATATCTATATGC  
ACTTGCAGAGAGGCTGAGACGAGGAAAAGACCATCAACTGATTTTCTGGAACAATTC  
AGAAGGATGTGAACCCAAGCATGAGGGCTATCCTGATTGACTGGCTTGTGGAAGTTG  
CTGAAGAATATCGTCTTGTTCCTGATACCTTATACCTGACAGTCAACTATATTGACCG  
TTACCTTTCCGGCAACGAGATCAATCGGCAAAGGCTGCAATTACTTGGTGTGCTTGC  
ATGCTTATAGCTGCTAAATATGAGGAGATTTGTGCACCCCAGGTAGAAGAATTCTGCT  
ACATCACTGACAATACATACTTCAAGGATGAGGTTCTGGATATGGAAGCTTCCGTCT  
CAATTACCTGAAGTTTGTGATGACCGCACCTACAGCAAAGTGCTTTTAAAGGAGATTT  
GTCCGGGCTGCACAAGTCTGTGATGAGGATCCACCTTGCATCTTGAGTTCCTAGCCA  
ATTATGTTGCTGAGCTATCACTGCTTGTGAGTACAGTCTACTTGCTTACCCTCCTTCACTT  
GTTGCGGCCTCCGCAATTTTCTTGTGCAAGTTCATACTGCAGCCAGCAAAAACACCCCT

GGAACTCCACCCTTGCCCACTACACACAGTACAAGCCATCGGAGCTCTGCGATTGTGT  
GAAGGCGCTGCACCGCCTTTTCAGCGTTGGTCCTGGGAGTAATCTTCCTGCAATCAGA  
GAAAAGTACAGCCAACATAAGTACAAATTTGTCGGGAAAAAGCAATGCCCAACTTCA  
GTGCCCGCAGAATTCTTCGGGACGCGGCATGCTAG
