# Supplementary material for: QTug.sau-3B Is a Major Quantitative Trait Locus for Wheat Hexaploidization
Source: PubMed Central journal article supplement (PMC4199700; doi:10.1534/g3.114.013078), 2014-08-15
Supplement: supp_g3.114.013078_TableS1.pdf [file supp_g3.114.013078_TableS1.pdf]

**Table S1 Primers used in this study**

| Name of primer | Primer sequences (5'→3') | Annealing temperature |
|----------------|--------------------------|-----------------------|
| 6C6-3-F1       | CTACTTCCACTGCACCAGAC     | 60                    |
| 6C6-3-R1       | CGCCCTACTTTGCACACAAAA    |                       |
| F1             | GTCGCTGAAGAATATCGTCTTGTT | 58                    |
| R1             | TGTTGGCTGCAGTATGAATTT    |                       |
| F2             | ATGTCGAGCAACTCCGC        | 60                    |
| R2             | CTAGCATGCCGCGTCCC        |                       |
| F10-RT         | GCTTACCCTCCTTCACTTGT     | 60                    |
| R10-RT         | CCTTCACGCAATCGCATAG      |                       |
