# Supplementary material for: QTug.sau-3B Is a Major Quantitative Trait Locus for Wheat Hexaploidization
Source: PubMed Central journal article supplement (PMC4199700; doi:10.1534/g3.114.013078), 2014-08-15
Supplement: supp_g3.114.013078_TableS4.pdf [file supp_g3.114.013078_TableS4.pdf]

> GenBank no. KJ863557 [organism=*Triticum turgidum*] *T. turgidum* Langdon Ttam-3A mRNA , complete cds

ATGTCGAGCAACTCCGCCGCCCCCGCCGCTTCTCGTCGGCGATGTCGACCGCGACGG  
CCAAGCGCCCGGCCGTGGCGGAGGGCGCCGGGGATCCAGGGCGGCGGGGCCCC  
GCGGCCGCCAGCAGCAGGCCAAGAAGCGCGTGGCGCTCGGCAACCTACCACCAAC  
GTCGCCGCGGCGGCCGCGGGCAGGGCCGGCTGCGGGAAGATCGCGGTCGTCACGGC  
GGGCAATGCGAGGTTGAATCAACTACCTCAGCTGCACCAGTGAAGAAGGGATCTTT  
GCCAAGTGCTCGGAATGCAAGCGCAAATCGTGGTTCGTCTGTGAAATCGGCTTCCAC  
CAAGCCAGCTCCTGTCACATCTCGCCATGAGGGCTCCATGCAGAAGGAGAGTGCTCC  
TCCTCGTAAGGTGCCTACGGCGGTGCCGATTGCCGTGCCTGCCGTTATACCCTCAGC  
AGCTTCGTGTCTCCTGGACATTCAGGAGATTCAATTTCCACTGACGAGACTATGTCGA  
GTTGCGACTCTATGAAGAGCCCCGATTTTCGAGTACATTGATAATGGTGACTCCTCATT  
GCTCGATTCTTTGCAACGACGGGCAAATGAAAACCTGCGCATTTCAGATGATAGAAC  
TGTGGAAGGAGCTAAGTGAAGAAGGATGCTGCTGCCCAATGGAAATTGACAACGT  
TTGTGACGTTGATGACAACCTATGAGGATCCACAGCTGTGTGCTACTCTTGCTTCTGAT  
ATCTATATGCACTTGCAGAGGGCTGAGACGAGGAAAAGACCATCAACTGATTTTCTG  
GAAACAATTCAGAAGGATGTGAACCCAAGCATGAGGGCTATCCTGATTGACTGGCTT  
GTGGAAGTTGCTGAAGAATATCGTCTTGTTCCTGATACCTTATACCTGACAGTCAACT  
ATATTGACCGTTACCTTTTCGGGCAACGAGATCAATCGCCAAAGGCTGCAATTACTCGG  
TGTCGCTTGCATGCTTATAGCTGCTAAATATGAGGAGATTTGTGCACCCCAGGTAGAA  
GAATTCTGCTACATCACTGACAATACCTACTTCAAGGATGAGGTTTTGGATATGGAAG  
CTTCCGTCCTCAATTACCTGAAGTTGAGATGACCGCACCTACAGCAAAGTGCTTTTT  
AAGGAGATTCGTCCGGGCTGCACAAGTCTGTGATGAGGATCCACCTTTGCATCTTGAG  
TTCCTAGCCAATTATGTTGCTGAGCTATCACTGCTTGAGTACAGTCTACTTGCTTACCC  
TCCTTCACTTGTTGCGGCCTCCGCAATTTTCTTGTCGAAGTTCATACTGCAGCCAGCAA  
AACACCCCTGGAACCTCACCTTGCCCACTACACACAGTACAAGCCGTCGGAGCTAT  
GCGATTGCGTGAAGGCGCTGCACCGCCTTTTCAGCGTTGGTCCTGGGAGTAATCTTCC  
TGCAATCAGAGAAAAGTACAGCCAACATAAGTACAAATTTGTCGGGAAGAAGCAAT  
GCCCAACTTCAGTGCCCGCAGAATTCTTCCGGGACGCGGCATGCTAG

> GenBank no. KJ863558 [organism=*Triticum turgidum*] *T. turgidum* Langdon Ttam-3B mRNA, complete cds

ATGTCGAGCAACTCCGCCGCCCCCGCCGCTTCTCGTCGGCGATGTCGACCTCGACGG  
CGAAGCGCCCTGCCGTGCCGGAGGGCGCCAGGGCGGCCGCGGGCCCCGCGGCCGCG  
CAGCAGCAGGCGAAGAAGCGCGTGGCGCTCGGCAACCTACCACCAACGTCGCCGCG  
GCGGCCGGGGCAGGGCCGGCTGCGGGAAGATCGCGGTCGTCACGGCAGGGCAATGC  
AAGGTTGAATTCAGCTACCTCAGTTGCACCTGTGAAGAAGGGAGCTTTGCCAAGTGC  
TCGGAATGCAAGCACAAATCGTGGCTCGGCTGTGAAATCGGCTTTCACCAAGCCAGC  
TCCTGTACATCTCGCCATGAGAGCTCCGTACAGAAGGAGAGTGTTCTCCTCGTAAG  
GTGCCTACTGTGGTGCCGATTGCCGTGCCTGCCGTTATACCCTCAGCAGCTTCGCGT  
CTCCTGGACATTCAGGAGATTCCATTTCCACTGACGAGACTATGTCGAGTTGCGACTC  
TATGAAGAGCCCCGACTTCGAGTACATTGATAATGGTGACTCCTCATTGCTCGATTCT

CTACAGCGACGGGCGAATGAAAACCTGCGCATTTTCAGATGATAGGACTGTGGAAGGA  
GCTAAGTGGAAGAAGGATGCTGCTGCTCCAATGGAAATTGACAACGTTTGTGACGTC  
GATGATAACTATGAGGATCCACAGCTGTGTGCTACTCTTGCTTCTGATATCTATATGC  
ACCTGCGAGAGGCTGAGACGAGGAAAAGACCATCAACTGATTTTCTGGAACAATTC  
AGAAGGATGTGAACCCAAGCATGAGGGCTATCCTGATTGACTGGCTTGTGGAAGTTG  
CTGAAGAATATCGTCTTGTTCCTGATACCTTATACCTGACAGTCAACTATATTGACCG  
TTACCTTTCCGGCAATGAGATCAATCGCCAAAGGCTGCAATTACTCGGTGTGCTTGC  
ATGCTTATAGCTGCTAAATATGAGGAGATTTGTGCACCCCAGGTAGAAGAATTCTGCT  
ACATCACTGACAATACATACTTCAAGGATGAGGTTTTGGATATGGAAGCTTCCGTCT  
CAATTACCTGAAGTTTGTGATGACCGCACCTACAGCAAAGTGCTTTTAAAGGAGATTT  
GTCCGGGCTGCACAAGTCTGTGATGAGGATCCACCTTTCATCTTGAGTTCCTAGCCA  
ATTATGTTGCTGAGCTATCACTGCTTGTGAGTACAGTCTACTTGCTTACCCTCCTTCACTT  
GTTGCGGCCTCTGCAATTTTCTTGTGCAAGTTCATACTGCAGCCAGCAAAAACACCCCT  
GGAACTCCACCCTTGCCACTACACACAGTACAAGCCGTCGGAGCTATGCGATTGTGT  
GAAGGCGCTGCACCGCCTTTTCAGCGTTGGTCTCTGGGAGTAATCTTCTGCAATCAGA  
GAAAAGTACAGCCAACATAAGTACAAATTTGTGCGGGAAGAAGCAATGCCCAAGTTCA  
GTCCCCGAGAATTCTTCCGGGACGCGGCATGCTAG

> GenBank no. KJ863559 [organism=*Triticum aestivum*] *T. aestivum* Chinese spring Ttam-3D  
mRNA, complete cds

ATGTCGAGCAACTCCGCCGCCCCCGCCGTTCTCGTCGGCGATGTCGACCTCGACGG  
CGAAGCGCCCGGCCGTGCCGGAGGGCGCCAGGGCGGCGGGCCCCGCGGCCGCG  
CAGCAGCAGGCCAAGAAGCGCGTGGCGCTCGGCAACCTCACCACCAACGTCGCCGCG  
GCGGCCGCGGGCAGGGCCGGCTGCGGGAAGATCGCGGTCGTCACGACGGGCAATGC  
GAGGTTGAATTCAGCTACCTCAGCTGCACCTGTGAAGAAGGGAGCTTTGCCAAGTGC  
TCGGAATGCAAGCGCAAATCGTGGCTCGGCTGTGAAATCGGCTTTCACCAAGCCAGC  
TCTGTACATCTCGCCATGAGAGCTCCGTACAGAAGGAGAGTGTTCCTCCTCGTAAG  
GTGCCTACTGTGGTGCCGATTGCCGTGCCTGCCGTTATACCCTTACAGCAGCTTCGTGT  
CTCCTGGACATTCAGGAGATTCGATTTCCACTGACGAGACTATGTGCGAGTTGCGATTC  
TATGAAGAGCCCCGATTTTCGAGTACATTGACAACGGTGACTCCTCATTGCTCGATTCT  
CTACAGCGACGGGCAAATGAAAACCTGCGCATTTTCAGATGATAGAACTGTGGAAGGA  
GCTAAGTGGAAGAAGGATGCTGCTGCCCAATGGAAATTGACAACGTTTGTGACGTT  
GATGATAACTACGAGGATCCACAGCTGTGTGCTACTCTTGCTTCTGATATCTATATGC  
ACTTGCAGAGAGGCTGAGACGAGGAAAAGACCATCAACTGATTTTCTGGAACAATTC  
AGAAGGATGTGAACCCAAGCATGAGGGCTATCCTGATTGACTGGCTTGTGGAAGTTG  
CTGAAGAATATCGTCTTGTTCCTGATACCTTATACCTGACAGTCAACTATATTGACCG  
TTACCTTTCCGGCAACGAGATCAATCGGCAAAGGCTGCAATTACTTGGTGTGCTTGC  
ATGCTTATAGCTGCTAAATATGAGGAGATTTGTGCACCCCAGGTAGAAGAATTCTGCT  
ACATCACTGACAATACATACTTCAAGGATGAGGTTCTGGATATGGAAGCTTCCGTCT  
CAATTACCTGAAGTTTGTGATGACCGCACCTACAGCAAAGTGCTTTTAAAGGAGATTT  
GTCCGGGCTGCACAAGTCTGTGATGAGGATCCACCTTTCATCTTGAGTTCCTAGCCA  
ATTATGTTGCTGAGCTATCACTGCTTGTGAGTACAGTCTACTTGCTTACCCTCCTTCACTT  
GTTGCGGCCTCCGCAATTTTCTTGTGCAAGTTCATACTGCAGCCAGCAAAAACACCCCT

GGAACTCCACCCTTGCCCACTACACACAGTACAAGCCATCGGAGCTCTGCGATTGTGT  
GAAGGCGCTGCACCGCCTTTTCAGCGTTGGTCCTGGGAGTAATCTTCCTGCAATCAGA  
GAAAAGTACAGCCAACATAAGTACAAATTTGTCGGGAAAAAGCAATGCCCAACTTCA  
GTGCCCGCAGAATTCTTCGGGACGCGGCATGCTAG
